# Supplementary material for: Cognitive Motivation as a Resource for Affective Adjustment and Mental Health
Source: PubMed Central journal article supplement (PMC8490806; doi:10.3389/fpsyg.2021.581681), 2021-09-21
Supplement: Data_Sheet_2.pdf [file Data_Sheet_2.pdf]

## Supplementary Material

### 1 Results of the analyses including all individuals without application of any BDI-II cut off

#### 1.1 Sample 1

Supplementary analyses of sample 1 included  $n_1 = 495$  individuals ( $M_{age} = 52.20$ ,  $SD = 8.37$ ; 67.27% females) of the original 530 individuals. 35 cases were excluded due to missing values. The median time distance between the first and the second assessment was 33 days (range: 14–77 days).

##### 1.1.1 Cross-sectional analyses

**Supplementary Table 1.** Descriptive statistics and correlation coefficients between  $t_1$ - and  $t_2$ -scores of all measures

|        | COM_t1     | COM_t2     | ESC_t1     | ESC_t2     | CEI_t1     | CEI_t2     | BDI_t1     | BDI_t2     | Mean  | SD    | Range  |
|--------|------------|------------|------------|------------|------------|------------|------------|------------|-------|-------|--------|
| COM_t1 | (.90)      | <b>.84</b> | .54        | .50        | .91        | .77        | -.46       | -.36       | 2.80  | 15.30 | -36–36 |
| COM_t2 | <b>.84</b> | (.77)      | .47        | .60        | .77        | .92        | -.44       | -.47       | 3.68  | 14.81 | -35–36 |
| ESC_t1 | .54        | .46        | (.89)      | <b>.75</b> | .84        | .66        | -.55       | -.43       | 0.85  | 11.55 | -34–29 |
| ESC_t2 | .51        | .59        | <b>.74</b> | (.93)      | .69        | .86        | -.54       | -.58       | 3.04  | 11.35 | -33–29 |
| CEI_t1 | .91        | .77        | .83        | .68        | (.91)      | <b>.82</b> | -.57       | -.44       | 3.65  | 23.65 | -54–53 |
| CEI_t2 | .78        | .92        | .65        | .85        | <b>.82</b> | (.79)      | -.54       | -.58       | 6.73  | 23.45 | -66–62 |
| BDI_t1 | -.45       | -.44       | -.55       | -.53       | -.56       | -.53       | (.89)      | <b>.71</b> | 25.43 | 11.89 | 0–58   |
| BDI_t2 | -.36       | -.47       | -.44       | -.56       | -.44       | -.57       | <b>.72</b> | (.95)      | 13.04 | 11.85 | 0–55   |

*Note.* Analyses of the first sample ( $n_1 = 495$ ). Internal consistencies (Cronbach's  $\alpha$ ) are presented in the diagonal, Pearson coefficients above, and Spearman's Rank coefficients below the diagonal. Bold-faced coefficients give the retest-reliabilities (interval on average 5 weeks). BDI = depressive symptoms; COM = cognitive motivation; ESC = effortful self-control; CEI = cognitive effort investment;  $t_1$  = before treatment;  $t_2$  = after treatment. For all coefficients  $p < .001$  (Bonferroni-adjusted  $\alpha = 0.0018$ ).

##### 1.1.2 Longitudinal analyses

###### *Latent change score modelling*

**Supplementary Table 2.** Results of the latent change score modelling in the first sample

| Variable                                 | $b$      | SE   | 95% CI |       | $\beta$ |
|------------------------------------------|----------|------|--------|-------|---------|
|                                          |          |      | LL     | UL    |         |
| $\Delta\text{COM} \sim \text{COM}_{t_1}$ | -0.22*** | 0.03 | -0.28  | -0.15 | -0.38   |
| $\Delta\text{COM} \sim \text{ESC}_{t_1}$ | -0.02    | 0.05 | -0.10  | 0.07  | -0.02   |
| $\Delta\text{COM} \sim \text{BDI}_{t_1}$ | -0.09*   | 0.04 | -0.17  | -0.01 | -0.12   |
| $\Delta\text{BDI} \sim \text{COM}_{t_1}$ | -0.01    | 0.03 | -0.07  | 0.04  | -0.03   |
| $\Delta\text{BDI} \sim \text{ESC}_{t_1}$ | -0.05    | 0.04 | -0.14  | 0.04  | -0.06   |
| $\Delta\text{BDI} \sim \text{BDI}_{t_1}$ | -0.32*** | 0.04 | -0.41  | -0.24 | -0.43   |
| $\Delta\text{ESC} \sim \text{COM}_{t_1}$ | 0.07*    | 0.03 | 0.01   | 0.13  | 0.14    |
| $\Delta\text{ESC} \sim \text{ESC}_{t_1}$ | -0.40*** | 0.04 | -0.48  | -0.33 | -0.57   |
| $\Delta\text{ESC} \sim \text{BDI}_{t_1}$ | -0.16*** | 0.04 | -0.23  | -0.08 | -0.23   |

*Note.*  $n_1 = 495$ . BDI = depressive symptoms; COM = cognitive motivation; ESC = effortful self-control;  $t_1$  = before treatment;  $\Delta$  = latent change score (i.e., the change from  $t_1$  to  $t_2$ );  $\sim$  = predicted by; CI = confidence interval; LL = lower limit; UL = upper limit. \*  $p < .05$ , \*\*  $p < .01$ , \*\*\*  $p < .001$ .

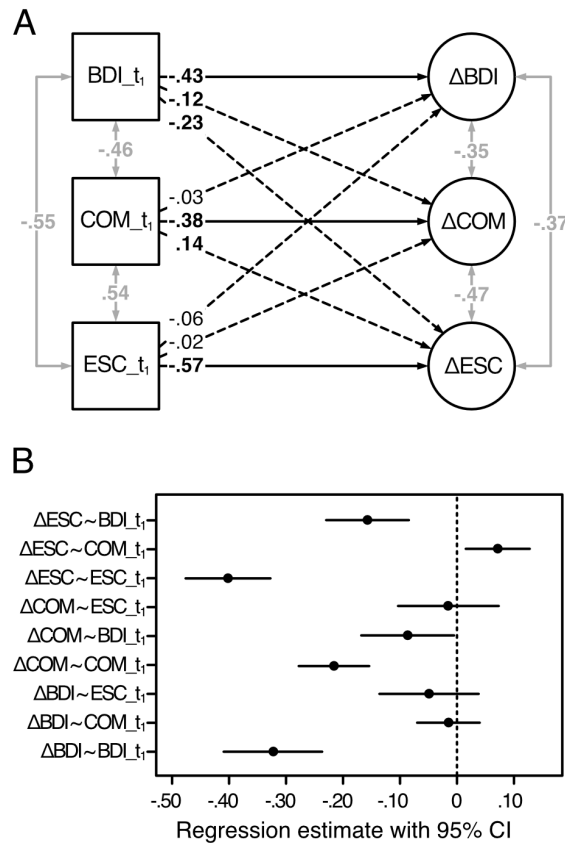

**Supplementary Figure 1.** Estimated latent change score model of the change scores predicted by the baseline scores. Supplementary analysis based on the first sample ( $n_1 = 495$ ). BDI = depressive symptoms; COM = cognitive motivation; ESC = effortful self-control;  $t_1$  = before treatment;  $\Delta$  = latent change score (i.e., the change from  $t_1$  to  $t_2$ ). Panel A: Standardized regression coefficients are displayed. One-sided solid and dashed arrows refer to the model presented in the main text and indicate directed effects (regression coefficients), two-sided grey arrows indicate undirected relationships (correlations). Coefficients in bold are significant for  $p < .05$ . Panel B: 95% confidence intervals of the unstandardized regression estimates, based on 1000 bootstrap samples.

### Mediation analyses

**Supplementary Table 3.** Results of the mediation analysis in the first sample

| Effect | $b$      | SE   | 95% CI |       | $\beta$ |
|--------|----------|------|--------|-------|---------|
|        |          |      | LL     | UL    |         |
| a      | -0.25*** | 0.03 | -0.32  | -0.18 | -0.07   |
| b      | 0.72***  | 0.05 | 0.63   | 0.82  | 0.63    |
| c      | -0.06    | 0.04 | -0.13  | 0.01  | -0.01   |
| ab     | -0.18*** | 0.03 | -0.23  | -0.13 | -0.04   |
| total  | -0.24*** | 0.04 | -0.32  | -0.16 | -0.05   |

*Note.*  $n_1 = 495$ . CI = confidence interval; LL = lower limit; UL = upper limit. a = direct effect of the change in depressive symptoms ( $\Delta$ BDI) on the change in cognitive motivation ( $\Delta$ COM); b = direct effect of  $\Delta$ COM on the change in self-regulation ( $\Delta$ ESC); c = direct effect of  $\Delta$ BDI on  $\Delta$ ESC with mediator ( $\Delta$ COM); ab = indirect mediating effect of  $\Delta$ BDI on  $\Delta$ ESC via  $\Delta$ COM; total = direct effect of  $\Delta$ BDI on the change in self-regulation without mediation. \*\*\*  $p < .001$ .

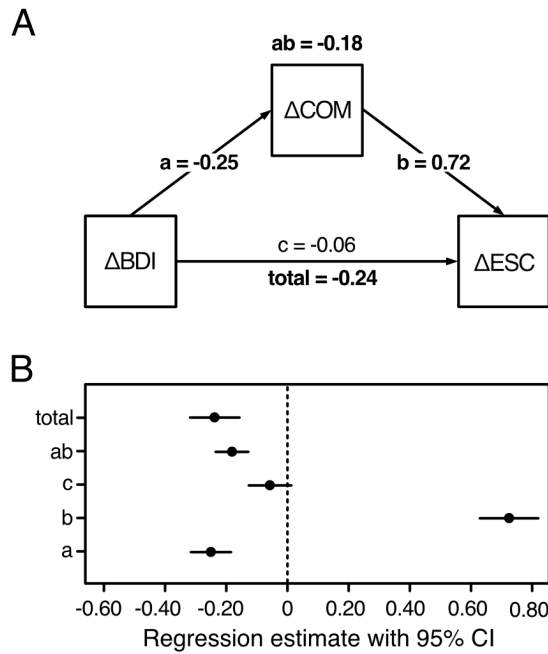

**Supplementary Figure 2.** Results and model of the supplementary mediation analysis of the first sample ( $n_1 = 495$ ). BDI = depressive symptoms; COM = cognitive motivation; ESC = effortful self-control;  $\Delta$  = latent change score (i.e., the change from  $t_1$  to  $t_2$ ). Panel A: Increasing cognitive motivation completely mediates the association between decreasing depressive symptoms and increasing self-regulation. The following unstandardized effects are displayed: total (direct effect without mediation) =  $ab$  (indirect mediating effect) +  $c$  (direct effect with mediator). Panel B: 95% confidence intervals of the unstandardized regression estimates, based on 1000 bootstrap samples.

## 1.2 Sample 2

Supplementary analyses of sample 2 included  $n_2 = 488$  individuals ( $M_{age} = 51.47$ ,  $SD = 8.88$ ; 67.42% females) of the original 530 individuals. 42 cases had to be excluded due to missing values. The median time distance between the first and the second assessment was 33 days (range: 13–75 days).

Unequal variance t-test revealed no differences between the samples of sample 1 and sample 2 with respect to age ( $t_{(975.68)} = 1.32$ ,  $p = 0.186$ ), gender ( $t_{(980.83)} = -0.05$ ,  $p = 0.961$ ), nor any of the variables' means: COM\_  $t_1$  ( $t_{(977.88)} = 0.02$ ,  $p = 0.987$ ), COM\_  $t_2$  ( $t_{(980.53)} = 0.41$ ,  $p = 0.681$ ), ESC\_  $t_1$  ( $t_{(980.04)} = 0.47$ ,  $p = 0.635$ ), ESC\_  $t_2$  ( $t_{(977.99)} = 0.50$ ,  $p = 0.617$ ), BDI\_  $t_1$  ( $t_{(977.35)} = -0.80$ ,  $p = 0.425$ ), BDI\_  $t_2$  ( $t_{(980.79)} = 0.21$ ,  $p = 0.835$ ).

### 1.2.1 Cross-sectional analyses

**Supplementary Table 4.** Descriptive statistics and correlation coefficients between t<sub>1</sub>- and t<sub>2</sub>-scores of all measures

|                   | COM <sub>t1</sub> | COM <sub>t2</sub> | ESC <sub>t1</sub> | ESC <sub>t2</sub> | CEI <sub>t1</sub> | CEI <sub>t2</sub> | BDI <sub>t1</sub> | BDI <sub>t2</sub> | Mean  | SD    | Range  |
|-------------------|-------------------|-------------------|-------------------|-------------------|-------------------|-------------------|-------------------|-------------------|-------|-------|--------|
| COM <sub>t1</sub> | (.88)             | <b>.82</b>        | .58               | .54               | .91               | .77               | -.39              | -.38              | 2.79  | 14.26 | -36–35 |
| COM <sub>t2</sub> | <b>.81</b>        | (.79)             | .47               | .62               | .74               | .92               | -.37              | -.47              | 3.30  | 14.28 | -36–36 |
| ESC <sub>t1</sub> | .56               | .43               | (.89)             | <b>.76</b>        | .87               | .67               | -.48              | -.40              | 0.50  | 11.75 | -32–32 |
| ESC <sub>t2</sub> | .53               | .58               | <b>.74</b>        | (.91)             | .72               | .88               | -.47              | -.56              | 2.67  | 11.83 | -33–36 |
| CEI <sub>t1</sub> | .91               | .72               | .85               | .69               | (.91)             | <b>.81</b>        | -.49              | -.43              | 3.29  | 23.17 | -68–63 |
| CEI <sub>t2</sub> | .77               | .91               | .64               | .85               | <b>.80</b>        | (.82)             | -.47              | -.57              | 5.98  | 23.49 | -69–72 |
| BDI <sub>t1</sub> | -.39              | -.36              | -.47              | -.45              | -.48              | -.45              | (.89)             | <b>.71</b>        | 26.01 | 11.03 | 1–56   |
| BDI <sub>t2</sub> | -.36              | -.44              | -.41              | -.58              | -.43              | -.56              | <b>.69</b>        | (.94)             | 12.89 | 11.51 | 0–50   |

Note. Supplementary analyses of the second sample ( $n_2 = 488$ ). Internal consistencies (Cronbach's alpha) are presented in the diagonal, Pearson coefficients above, and Spearman's Rank coefficients below the diagonal. Bold-faced coefficients give the retest-reliabilities (interval on average 5 weeks). BDI = depressive symptoms; COM = cognitive motivation; ESC = effortful self-control; CEI = cognitive effort investment; t<sub>1</sub> = before treatment; t<sub>2</sub> = after treatment. For all coefficients  $p < .001$  (Bonferroni-adjusted  $\alpha = 0.0018$ ).

### 1.2.2 Longitudinal analyses

#### *Latent change score modelling*

**Supplementary Table 5.** Results of the latent change score modelling in the second sample

| Variable                                | <i>b</i> | SE   | 95% CI |       | $\beta$ |
|-----------------------------------------|----------|------|--------|-------|---------|
|                                         |          |      | LL     | UL    |         |
| $\Delta\text{COM} \sim \text{COM}_{t1}$ | -0.19*** | 0.03 | -0.25  | -0.13 | -0.31   |
| $\Delta\text{COM} \sim \text{ESC}_{t1}$ | -0.05    | 0.04 | -0.13  | 0.03  | -0.07   |
| $\Delta\text{COM} \sim \text{BDI}_{t1}$ | -0.10*   | 0.04 | -0.17  | -0.02 | -0.13   |
| $\Delta\text{BDI} \sim \text{COM}_{t1}$ | -0.09**  | 0.03 | -0.15  | -0.03 | -0.15   |
| $\Delta\text{BDI} \sim \text{ESC}_{t1}$ | -0.02    | 0.04 | -0.09  | 0.05  | -0.02   |
| $\Delta\text{BDI} \sim \text{BDI}_{t1}$ | -0.32*** | 0.04 | -0.40  | -0.23 | -0.40   |
| $\Delta\text{ESC} \sim \text{COM}_{t1}$ | 0.11***  | 0.03 | 0.05   | 0.17  | 0.19    |
| $\Delta\text{ESC} \sim \text{ESC}_{t1}$ | -0.37*** | 0.04 | -0.44  | -0.30 | -0.53   |
| $\Delta\text{ESC} \sim \text{BDI}_{t1}$ | -0.13*** | 0.03 | -0.20  | -0.06 | -0.18   |

Note.  $n_2 = 488$ . BDI = depressive symptoms; COM = cognitive motivation; ESC = effortful self-control; t<sub>1</sub> = before treatment;  $\Delta$  = latent change score (i.e., the change from t<sub>1</sub> to t<sub>2</sub>);  $\sim$  = predicted by; CI = confidence interval; LL = lower limit; UL = upper limit. \*  $p < .05$ , \*\*  $p < .01$ , \*\*\*  $p < .001$ .

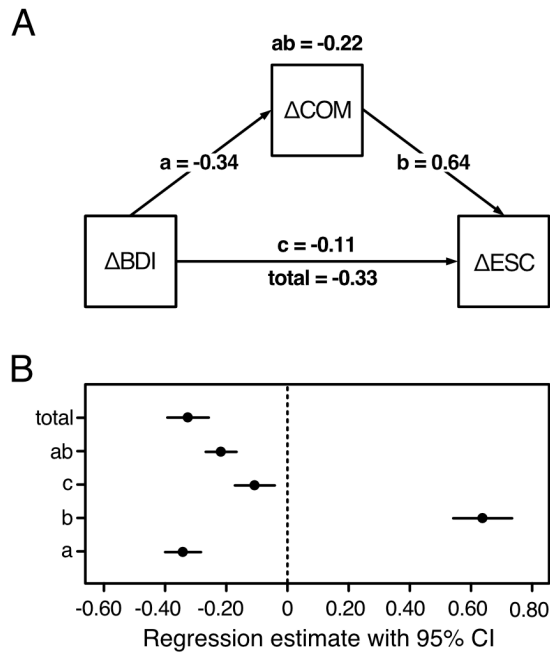

**Supplementary Figure 3.** Estimated latent change score model of the change scores predicted by the baseline scores. Supplementary analysis based on the second sample ( $n_2 = 488$ ). BDI = depressive symptoms; COM = cognitive motivation; ESC = effortful self-control;  $t_1$  = before treatment;  $\Delta$  = latent change score (i.e., the change from  $t_1$  to  $t_2$ ). Panel A: Standardized regression coefficients are displayed. One-sided dotted and dashed arrows refer to the model presented in the main text and indicate directed effects (regression coefficients), two-sided grey arrows indicate undirected relationships (correlations). Coefficients in bold are significant for  $p < .05$ . Panel B: 95% confidence intervals of the unstandardized regression estimates, based on 1000 bootstrap samples.

### Mediation analyses

**Supplementary Table 6.** Results of the mediation analysis in the second sample

| Effect | $b$      | SE   | 95% CI |       | $\beta$ |
|--------|----------|------|--------|-------|---------|
|        |          |      | LL     | UL    |         |
| a      | -0.47*** | 0.04 | -0.54  | -0.39 | -0.10   |
| b      | 0.37***  | 0.05 | 0.27   | 0.47  | 0.36    |
| c      | -0.34*** | 0.04 | -0.42  | -0.26 | -0.07   |
| ab     | -0.17*** | 0.03 | -0.23  | -0.12 | -0.04   |
| total  | -0.51*** | 0.04 | -0.59  | -0.44 | -0.11   |

Note.  $n_2 = 488$ . CI = confidence interval; LL = lower limit; UL = upper limit. For all  $p < .001$ . Effects: a = direct effect of the change in depressive symptoms ( $\Delta$ BDI) on the change in cognitive motivation ( $\Delta$ COM); b = direct effect of  $\Delta$ COM on the change in self-regulation ( $\Delta$ ESC); c = direct effect of  $\Delta$ BDI on  $\Delta$ ESC with mediator ( $\Delta$ COM); ab = indirect mediating effect of  $\Delta$ BDI on  $\Delta$ ESC via  $\Delta$ COM; total = direct effect of  $\Delta$ BDI on the change in self-regulation without mediation. \*\*\*  $p < .001$ .

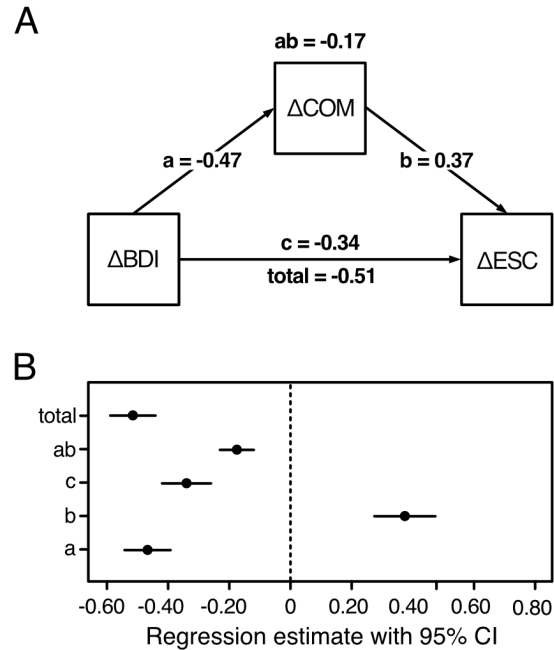

**Supplementary Figure 4.** Results and model of the supplementary mediation analysis of the second sample ( $n_2 = 488$ ). BDI = depressive symptoms; COM = cognitive motivation; ESC = effortful self-control;  $\Delta$  = latent change score (i.e., the change from  $t_1$  to  $t_2$ ). Panel A: Increasing cognitive motivation partly mediates the association between decreasing depressive symptoms and increasing self-regulation. The following unstandardized effects are displayed: total (direct effect without mediation) =  $ab$  (indirect mediating effect) +  $c$  (direct effect with mediator). Panel B: 95% confidence intervals of the unstandardized regression estimates, based on 1000 bootstrap samples.

## 2 Results of the analyses including only individuals with BDI-II score > 11

### 2.1 Sample 1

Supplementary analyses of sample 1 included  $n_1 = 427$  individuals ( $M_{age} = 51.92$ ,  $SD = 8.53$ ; 69.09% females) of the original 530 individuals. 35 cases were excluded due to missing values and 68 cases due to BDI-II scores < 12 (Riedel et al., 2010). The median time distance between the first and the second assessment was 33 days (range: 14–77 days).

## 2.1.1 Cross-sectional analyses

**Supplementary Table 7.** Descriptive statistics and correlation coefficients between t<sub>1</sub>- and t<sub>2</sub>-scores of all measures

|                    | COM_t <sub>1</sub> | COM_t <sub>2</sub> | ESC_t <sub>1</sub> | ESC_t <sub>2</sub> | CEI_t <sub>1</sub> | CEI_t <sub>2</sub> | BDI_t <sub>1</sub> | BDI_t <sub>2</sub> | Mean  | SD    | Range  |
|--------------------|--------------------|--------------------|--------------------|--------------------|--------------------|--------------------|--------------------|--------------------|-------|-------|--------|
| COM_t <sub>1</sub> | (.89)              | <b>.82</b>         | .52                | .46                | .91                | .75                | -.39               | -.30               | 1.01  | 14.99 | -36–36 |
| COM_t <sub>2</sub> | <b>.82</b>         | (.75)              | .43                | .57                | .75                | .92                | -.40               | -.44               | 2.19  | 14.60 | -35–36 |
| ESC_t <sub>1</sub> | .51                | .43                | (.88)              | <b>.72</b>         | .82                | .62                | -.46               | -.37               | -0.89 | 10.99 | -34–29 |
| ESC_t <sub>2</sub> | .46                | .56                | <b>.71</b>         | (.89)              | .65                | .85                | -.48               | -.55               | 1.48  | 10.85 | -33–28 |
| CEI_t <sub>1</sub> | .91                | .75                | .81                | .64                | (.91)              | <b>.80</b>         | -.48               | -.38               | 0.12  | 22.71 | -54–52 |
| CEI_t <sub>2</sub> | .75                | .92                | .61                | .83                | <b>.79</b>         | (.77)              | -.48               | -.55               | 3.68  | 22.61 | -66–62 |
| BDI_t <sub>1</sub> | -.38               | -.40               | -.46               | -.46               | -.47               | -.48               | (.88)              | <b>.68</b>         | 28.33 | 10.04 | 12–58  |
| BDI_t <sub>2</sub> | -.29               | -.45               | -.35               | -.52               | -.36               | -.54               | <b>.65</b>         | (.94)              | 14.69 | 11.86 | 0–55   |

*Note.* Analyses of the first sample ( $n_1 = 427$ ). Internal consistencies (Cronbach's alpha) are presented in the diagonal, Pearson coefficients above, and Spearman's Rank coefficients below the diagonal. Bold-faced coefficients give the retest-reliabilities (interval on average 5 weeks). BDI = depressive symptoms; COM = cognitive motivation; ESC = effortful self-control; CEI = cognitive effort investment; t<sub>1</sub> = before treatment; t<sub>2</sub> = after treatment. For all coefficients  $p < .001$  (Bonferroni-adjusted  $\alpha = 0.0018$ ).

## 2.1.2 Longitudinal analyses

### *Latent change score modelling*

**Supplementary Table 8.** Results of the latent change score modelling in the first sample

| Variable                                 | <i>b</i> | SE   | 95% CI    |           | $\beta$ |
|------------------------------------------|----------|------|-----------|-----------|---------|
|                                          |          |      | <i>LL</i> | <i>UL</i> |         |
| $\Delta\text{COM} \sim \text{COM}_{t_1}$ | -0.23*** | 0.04 | -0.30     | -0.16     | -0.38   |
| $\Delta\text{COM} \sim \text{ESC}_{t_1}$ | -0.02    | 0.05 | -0.12     | 0.07      | -0.03   |
| $\Delta\text{COM} \sim \text{BDI}_{t_1}$ | -0.13*   | 0.05 | -0.24     | -0.03     | -0.15   |
| $\Delta\text{BDI} \sim \text{COM}_{t_1}$ | -0.01    | 0.03 | -0.08     | 0.05      | -0.02   |
| $\Delta\text{BDI} \sim \text{ESC}_{t_1}$ | -0.07    | 0.05 | -0.17     | 0.03      | -0.08   |
| $\Delta\text{BDI} \sim \text{BDI}_{t_1}$ | -0.24*** | 0.05 | -0.34     | -0.13     | -0.27   |
| $\Delta\text{ESC} \sim \text{COM}_{t_1}$ | 0.06     | 0.03 | -0.002    | 0.12      | 0.11    |
| $\Delta\text{ESC} \sim \text{ESC}_{t_1}$ | -0.41*** | 0.04 | -0.50     | -0.33     | -0.55   |
| $\Delta\text{ESC} \sim \text{BDI}_{t_1}$ | -0.18*** | 0.05 | -0.27     | -0.09     | -0.22   |

*Note.*  $n_1 = 427$ . BDI = depressive symptoms; COM = cognitive motivation; ESC = effortful self-control; t<sub>1</sub> = before treatment;  $\Delta$  = latent change score (i.e., the change from t<sub>1</sub> to t<sub>2</sub>);  $\sim$  = predicted by; CI = confidence interval; LL = lower limit; UL = upper limit. \*  $p < .05$ , \*\*  $p < .01$ , \*\*\*  $p < .001$ .

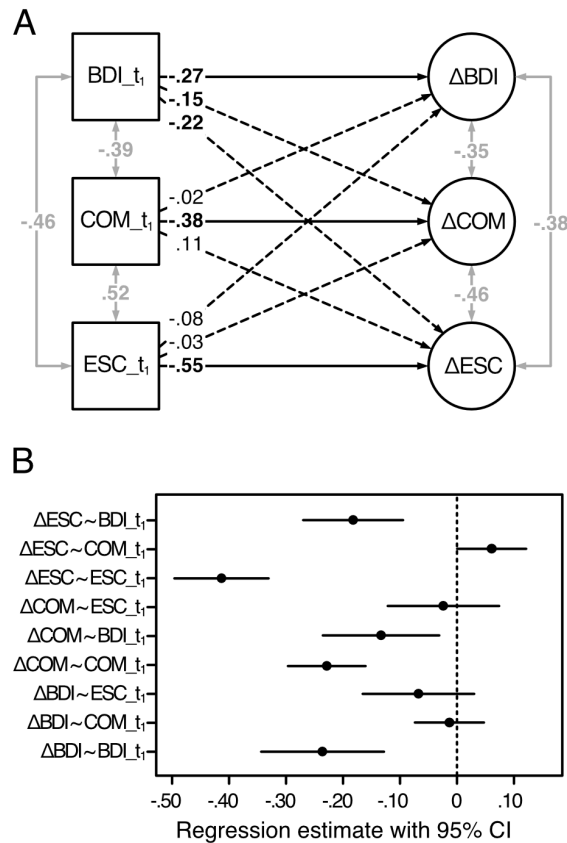

**Supplementary Figure 5.** Estimated latent change score model of the change scores predicted by the baseline scores. Supplementary analysis based on the first sample ( $n_1 = 427$ ). BDI = depressive symptoms; COM = cognitive motivation; ESC = effortful self-control;  $t_1$  = before treatment;  $\Delta$  = latent change score (i.e., the change from  $t_1$  to  $t_2$ ). Panel A: Standardized regression coefficients are displayed. One-sided dotted and dashed arrows refer to the model presented in the main text and indicate directed effects (regression coefficients), two-sided grey arrows indicate undirected relationships (correlations). Coefficients in bold are significant for  $p < .05$ . Panel B: 95% confidence intervals of the unstandardized regression estimates, based on 1000 bootstrap samples.

### Mediation analyses

**Supplementary Table 9.** Results of the mediation analysis in the first sample

| Effect | $b$      | SE   | 95% CI |       | $\beta$ |
|--------|----------|------|--------|-------|---------|
|        |          |      | LL     | UL    |         |
| a      | -0.37*** | 0.03 | -0.42  | -0.32 | -0.09   |
| b      | 0.50***  | 0.06 | 0.39   | 0.62  | 0.47    |
| c      | -0.18*** | 0.04 | -0.25  | -0.11 | -0.04   |
| ab     | -0.18*** | 0.03 | -0.24  | -0.13 | -0.04   |
| total  | -0.37*** | 0.03 | -0.43  | -0.31 | -0.08   |

Note.  $n_1 = 427$ . CI = confidence interval; LL = lower limit; UL = upper limit. For all  $p < .001$ . Effects: a = direct effect of the change in depressive symptoms ( $\Delta$ BDI) on the change in cognitive motivation ( $\Delta$ COM); b = direct effect of  $\Delta$ COM on the change in self-regulation ( $\Delta$ ESC); c = direct effect of  $\Delta$ BDI on  $\Delta$ ESC with mediator ( $\Delta$ COM); ab = indirect effect of  $\Delta$ BDI on  $\Delta$ ESC via  $\Delta$ COM; total = direct effect of  $\Delta$ BDI on the change in self-regulation without mediation. \*\*\*  $p < .001$ .



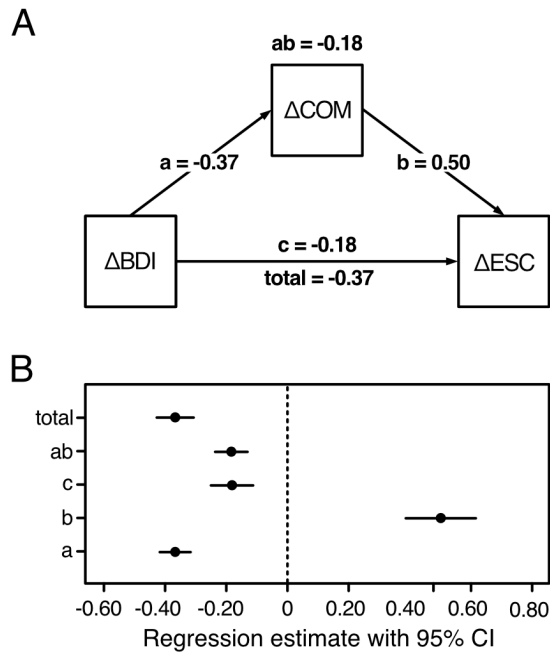

**Supplementary Figure 6.** Results and model of the supplementary mediation analysis of the first sample ( $n_1 = 427$ ). BDI = depressive symptoms; COM = cognitive motivation; ESC = effortful self-control;  $\Delta$  = latent change score (i.e., the change from  $t_1$  to  $t_2$ ). Panel A: Increasing cognitive motivation partly mediates the association between decreasing depressive symptoms and increasing self-regulation. The following unstandardized effects are displayed: total (direct effect without mediation) =  $ab$  (indirect mediating effect) +  $c$  (direct effect with mediator). Panel B: 95% confidence intervals of the unstandardized regression estimates, based on 1000 bootstrap samples.

## 2.2 Sample 2

Supplementary analyses of sample 2 included  $n_2 = 443$  individuals ( $M_{age} = 51.57$ ,  $SD = 8.88$ ; 68.85% females) of the original 530 individuals. 42 cases had to be excluded due to missing values; 45 cases were excluded due to subthreshold BDI scores. The median time distance between the first and the second assessment was 34 days for the Abridged Cognitive Effort Scales and 35 days for Beck Depression Inventory-II (range: 14–75 days).

Unequal variance t-test revealed no differences between the samples of sample 1 and sample 2 with respect to age ( $t_{(867.98)} = 0.60$ ,  $p = 0.546$ ), gender ( $t_{(866.95)} = 0.08$ ,  $p = 0.940$ ), nor any of the variables' means:  $COM_{t_1}$  ( $t_{(858.40)} = -0.57$ ,  $p = 0.571$ ),  $COM_{t_2}$  ( $t_{(863.60)} = -0.08$ ,  $p = 0.936$ ),  $ESC_{t_1}$  ( $t_{(867.73)} = -0.19$ ,  $p = 0.850$ ),  $ESC_{t_2}$  ( $t_{(867.61)} = -0.27$ ,  $p = 0.790$ ),  $BDI_{t_1}$  ( $t_{(864.81)} = 0.70$ ,  $p = 0.485$ ),  $BDI_{t_2}$  ( $t_{(864.61)} = 0.95$ ,  $p = 0.341$ ).

## 2.2.1 Cross-sectional analyses

**Supplementary Table 10.** Descriptive statistics and correlation coefficients between  $t_1$ - and  $t_2$ -scores of all measures

|        | COM_t1     | COM_t2     | ESC_t1     | ESC_t2     | CEI_t1     | CEI_t2     | BDI_t1     | BDI_t2     | Mean  | SD    | Range  |
|--------|------------|------------|------------|------------|------------|------------|------------|------------|-------|-------|--------|
| COM_t1 | (.88)      | <b>.82</b> | .55        | .52        | .91        | .76        | -.32       | -.34       | 1.57  | 13.99 | -36–35 |
| COM_t2 | <b>.80</b> | (.76)      | .44        | .60        | .73        | .92        | -.32       | -.45       | 2.27  | 14.11 | -36–36 |
| ESC_t1 | .53        | .39        | (.88)      | <b>.74</b> | .85        | .64        | -.39       | -.35       | -0.74 | 11.20 | -32–30 |
| ESC_t2 | .50        | .56        | <b>.72</b> | (.89)      | .70        | .87        | -.42       | -.55       | 1.68  | 11.49 | -33–36 |
| CEI_t1 | .90        | .71        | .83        | .67        | (.91)      | <b>.80</b> | -.40       | -.39       | 0.82  | 22.24 | -68–59 |
| CEI_t2 | .75        | .91        | .61        | .85        | <b>.79</b> | (.81)      | -.41       | -.55       | 3.96  | 22.90 | -69–72 |
| BDI_t1 | -.31       | -.31       | -.38       | -.40       | -.39       | -.39       | (.88)      | <b>.69</b> | 27.86 | 9.80  | 12–56  |
| BDI_t2 | -.31       | -.42       | -.35       | -.55       | -.37       | -.54       | <b>.65</b> | (.94)      | 13.93 | 11.55 | 0–50   |

*Note.* Analyses of the second sample ( $n_2 = 443$ ). Internal consistencies (Cronbach's alpha) are presented in the diagonal, Pearson coefficients above, and Spearman's Rank coefficients below the diagonal. Bold-faced coefficients give the retest-reliabilities (interval on average 5 weeks). BDI = depressive symptoms; COM = cognitive motivation; ESC = effortful self-control; CEI = cognitive effort investment;  $t_1$  = before treatment;  $t_2$  = after treatment. For all coefficients  $p < .001$  (Bonferroni-adjusted  $\alpha = 0.0018$ ).

## 2.2.2 Longitudinal analyses

### *Latent change score modelling*

**Supplementary Table 11.** Results of the latent change score modelling in the second sample

| Variable                                | <i>b</i> | SE   | 95% CI |       | $\beta$ |
|-----------------------------------------|----------|------|--------|-------|---------|
|                                         |          |      | LL     | UL    |         |
| $\Delta\text{COM} \sim \text{COM}_{t1}$ | -0.18*** | 0.03 | -0.24  | -0.12 | -0.30   |
| $\Delta\text{COM} \sim \text{ESC}_{t1}$ | -0.05    | 0.04 | -0.14  | 0.04  | -0.07   |
| $\Delta\text{COM} \sim \text{BDI}_{t1}$ | -0.11**  | 0.04 | -0.20  | -0.03 | -0.13   |
| $\Delta\text{BDI} \sim \text{COM}_{t1}$ | -0.09**  | 0.03 | -0.16  | -0.03 | -0.15   |
| $\Delta\text{BDI} \sim \text{ESC}_{t1}$ | -0.04    | 0.04 | -0.12  | 0.04  | -0.05   |
| $\Delta\text{BDI} \sim \text{BDI}_{t1}$ | -0.25*** | 0.05 | -0.35  | -0.16 | -0.29   |
| $\Delta\text{ESC} \sim \text{COM}_{t1}$ | 0.11***  | 0.03 | 0.05   | 0.18  | 0.19    |
| $\Delta\text{ESC} \sim \text{ESC}_{t1}$ | -0.38*** | 0.04 | -0.45  | -0.30 | -0.51   |
| $\Delta\text{ESC} \sim \text{BDI}_{t1}$ | -0.16*** | 0.04 | -0.24  | -0.09 | -0.19   |

*Note.*  $n_2 = 443$ . BDI = depressive symptoms; COM = cognitive motivation; ESC = effortful self-control;  $t_1$  = before treatment;  $\Delta$  = latent change score (i.e., the change from  $t_1$  to  $t_2$ );  $\sim$  = predicted by; CI = confidence interval; LL = lower limit; UL = upper limit. \*  $p < .05$ , \*\*  $p < .01$ , \*\*\*  $p < .001$ .

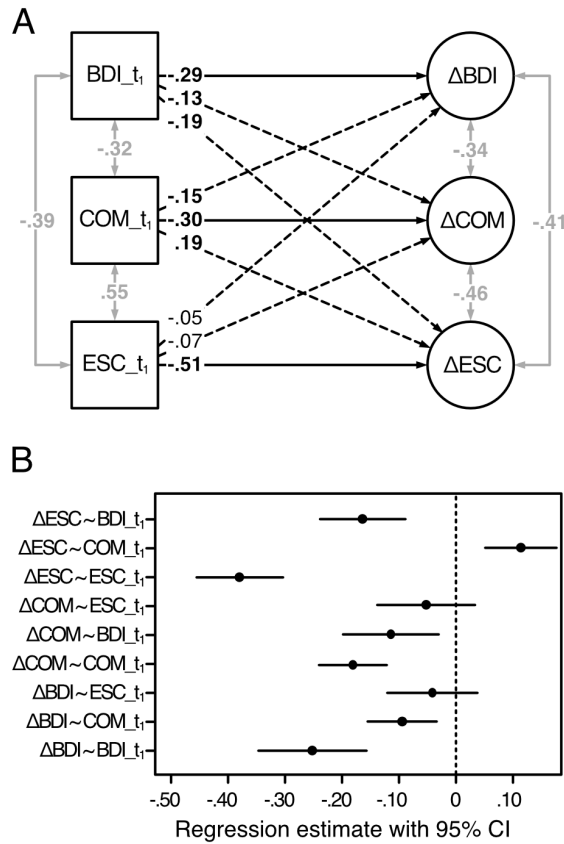

**Supplementary Figure 7.** Estimated latent change score model of the change scores predicted by the baseline scores. Supplementary analysis based on the second sample ( $N = 443$ ). BDI = depressive symptoms; COM = cognitive motivation; ESC = effortful self-control;  $t_1$  = before treatment;  $\Delta$  = latent change score (i.e., the change from  $t_1$  to  $t_2$ ). Panel A: Standardized regression coefficients are displayed. One-sided dotted and dashed arrows refer to the model presented in the main text and indicate directed effects (regression coefficients), two-sided grey arrows indicate undirected relationships (correlations). Coefficients in bold are significant for  $p < .05$ . Panel B: 95% confidence intervals of the unstandardized regression estimates, based on 1000 bootstrap samples.

### Mediation analyses

**Supplementary Table 12.** Results of the mediation analysis in the second sample

| Effect | $b$      | SE   | 95% CI |       | $\beta$ |
|--------|----------|------|--------|-------|---------|
|        |          |      | LL     | UL    |         |
| a      | -0.46*** | 0.03 | -0.51  | -0.40 | -0.09   |
| b      | 0.26***  | 0.06 | 0.15   | 0.37  | 0.23    |
| c      | -0.43*** | 0.03 | -0.50  | -0.36 | -0.08   |
| ab     | -0.12*** | 0.03 | -0.17  | -0.06 | -0.02   |
| total  | -0.55*** | 0.03 | -0.61  | -0.49 | -0.10   |

Note.  $n_2 = 443$ . CI = confidence interval; LL = lower limit; UL = upper limit. For all  $p < .001$ . Effects: a = direct effect of the change in depressive symptoms ( $\Delta$ BDI) on the change in cognitive motivation ( $\Delta$ COM); b = direct effect of  $\Delta$ COM on the change in self-regulation ( $\Delta$ ESC); c = direct effect of  $\Delta$ BDI on  $\Delta$ ESC with mediator ( $\Delta$ COM); ab = indirect mediating effect of  $\Delta$ BDI on  $\Delta$ ESC via  $\Delta$ COM; total = direct effect of  $\Delta$ BDI on the change in self-regulation without mediation. \*\*\*  $p < .001$ .

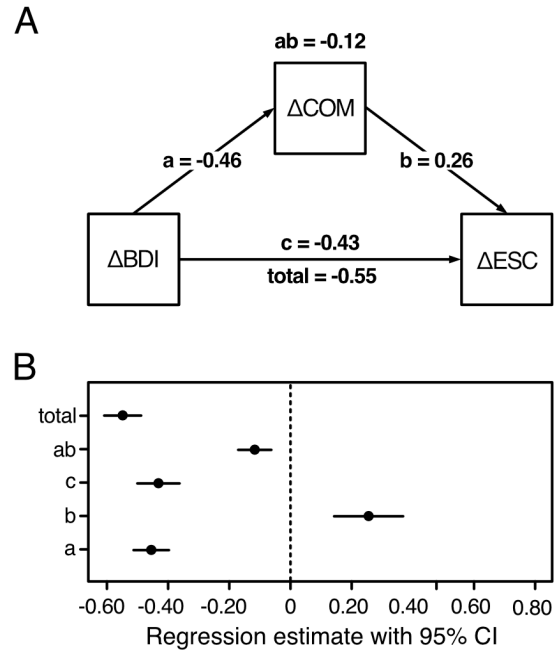

**Supplementary Figure 8.** Results and model of the supplementary mediation analysis of the second sample ( $N = 443$ ). BDI = depressive symptoms; COM = cognitive motivation; ESC = effortful self-control;  $\Delta$  = latent change score (i.e., the change from  $t_1$  to  $t_2$ ). Panel A: Increasing cognitive motivation partly mediates the association between decreasing depressive symptoms and increasing self-regulation. The following unstandardized effects are displayed: total (direct effect without mediation) =  $ab$  (indirect mediating effect) +  $c$  (direct effect with mediator). Panel B: 95% confidence intervals of the unstandardized regression estimates, based on 1000 bootstrap samples.
